# Supplementary material
Source: HighWire-hosted journal article supplement (https://www.canjsurg.ca/highwire/filestream/96785/field_highwire_adjunct_files/3/54-1-25-app4.pdf)
Supplement: 54-1-25-app4.pdf [file 54-1-25-app4.pdf]

#### Appendix 4: Individual problems list

Please rate the following 13 personal problems using the following scale:  
Circle **ONE** per item only

- 0= not a problem
- 1= little bit of a problem
- 2= a moderate problem
- 3= quite a problem
- 4= extreme problem

|                                                                 |   |   |   |   |   |
|-----------------------------------------------------------------|---|---|---|---|---|
| 1. Not enough time for self                                     | 0 | 1 | 2 | 3 | 4 |
| 2. Not enough leisure time                                      | 0 | 1 | 2 | 3 | 4 |
| 3. Not enough time for physical activities/<br>exercise, sports | 0 | 1 | 2 | 3 | 4 |
| 4. Not enough time to spend with<br>spouse/friends/relatives    | 0 | 1 | 2 | 3 | 4 |
| 5. Problems created by inflexibility of work<br>hours           | 0 | 1 | 2 | 3 | 4 |
| 6. Not enough time for study                                    | 0 | 1 | 2 | 3 | 4 |
| 7. Not confident enough about self in medicine                  | 0 | 1 | 2 | 3 | 4 |
| 8. Reservation about being a doctor                             | 0 | 1 | 2 | 3 | 4 |
| 9. Not enough money                                             | 0 | 1 | 2 | 3 | 4 |
| 10. Sexual drive decreased since beginning<br>residency         | 0 | 1 | 2 | 3 | 4 |
| 11. Not sure about choice of residency                          | 0 | 1 | 2 | 3 | 4 |
| 12. Feel treated unfairly by program staff                      | 0 | 1 | 2 | 3 | 4 |
| 13. Residents or medical people only people<br>seen socially    | 0 | 1 | 2 | 3 | 4 |
